# Supplementary material for: Rheological Characteristics of Model Gluten-Free Dough with Plantago Seeds and Husk Incorporation
Source: MDPI journal article supplement (doi:10.3390/foods11040536), 2022-02-13
Supplement: s1 [file s1]

**Table S1.** Significant Pearson's correlation coefficients (significance level  $\alpha \leq 0.01$ )

|       | H | DDT   | DSt   | DSo | MTI   | C2     | C3 | C4    | C5     | C3-C4  | C5-C4  | RE    | DEn    | DEx | LV     | SV     | WL     | FBH    | FBC | FBS | FBCh  | FBR | SBH    | SBC | SBS   | SBCh  | SBR |
|-------|---|-------|-------|-----|-------|--------|----|-------|--------|--------|--------|-------|--------|-----|--------|--------|--------|--------|-----|-----|-------|-----|--------|-----|-------|-------|-----|
| H     |   | 0.910 | 0.843 |     |       |        |    | -0.78 | -0.846 | 0.770  | -0.787 | 0.847 | 0.735  |     | 0.917  |        | -0.760 | -0.750 |     |     |       |     |        |     |       |       |     |
| DDT   |   |       | 0.857 |     |       | 0.829  |    |       |        | 0.716  |        | 0.862 | 0.794  |     | 0.806  |        |        |        |     |     |       |     |        |     |       |       |     |
| DSt   |   |       |       |     |       | 0.711  |    |       |        | 0.726  |        | 0.758 |        |     | 0.801  |        |        |        |     |     |       |     |        |     |       |       |     |
| DSo   |   |       |       |     | 0.949 | -0.788 |    |       |        |        |        |       |        |     |        |        |        |        |     |     |       |     |        |     |       |       |     |
| MTI   |   |       |       |     |       | -0.890 |    |       |        |        |        |       | -0.702 |     |        |        |        |        |     |     |       |     |        |     |       |       |     |
| C2    |   |       |       |     |       |        |    |       |        |        |        | 0.778 | 0.820  |     |        |        | -0.701 |        |     |     |       |     |        |     |       |       |     |
| C3    |   |       |       |     |       |        |    |       |        |        |        |       |        |     |        |        |        |        |     |     |       |     |        |     |       |       |     |
| C4    |   |       |       |     |       |        |    |       | 0.929  | -0.776 | 0.715  |       |        |     |        |        | 0.777  |        |     |     |       |     |        |     |       |       |     |
| C5    |   |       |       |     |       |        |    |       |        |        | 0.923  |       |        |     | -0.777 |        |        | 0.737  |     |     |       |     |        |     |       |       |     |
| C3-C4 |   |       |       |     |       |        |    |       |        |        |        | 0.803 |        |     |        | -0.708 | -0.880 |        |     |     |       |     |        |     |       |       |     |
| C5-C4 |   |       |       |     |       |        |    |       |        |        |        |       |        |     | -0.765 |        |        |        |     |     |       |     |        |     |       |       |     |
| RE    |   |       |       |     |       |        |    |       |        |        |        |       | 0.943  |     |        |        | -0.819 |        |     |     |       |     |        |     |       |       |     |
| DEn   |   |       |       |     |       |        |    |       |        |        |        |       |        |     |        |        | -0.752 |        |     |     |       |     |        |     |       |       |     |
| DEx   |   |       |       |     |       |        |    |       |        |        |        |       |        |     |        |        |        |        |     |     |       |     |        |     |       |       |     |
| LV    |   |       |       |     |       |        |    |       |        |        |        |       |        |     |        |        |        |        |     |     |       |     | -0.704 |     |       |       |     |
| SV    |   |       |       |     |       |        |    |       |        |        |        |       |        |     |        |        | 0.863  |        |     |     |       |     |        |     |       |       |     |
| WL    |   |       |       |     |       |        |    |       |        |        |        |       |        |     |        |        |        |        |     |     |       |     |        |     |       |       |     |
| FBH   |   |       |       |     |       |        |    |       |        |        |        |       |        |     |        |        |        |        |     |     | 0.936 |     |        |     |       |       |     |
| FBC   |   |       |       |     |       |        |    |       |        |        |        |       |        |     |        |        |        |        |     |     |       |     |        |     |       |       |     |
| FBS   |   |       |       |     |       |        |    |       |        |        |        |       |        |     |        |        |        |        |     |     |       |     |        |     |       |       |     |
| FBCh  |   |       |       |     |       |        |    |       |        |        |        |       |        |     |        |        |        |        |     |     |       |     |        |     |       |       |     |
| FBR   |   |       |       |     |       |        |    |       |        |        |        |       |        |     |        |        |        |        |     |     |       |     |        |     |       |       |     |
| SBH   |   |       |       |     |       |        |    |       |        |        |        |       |        |     |        |        |        |        |     |     |       |     |        |     | 0.877 |       |     |
| SBC   |   |       |       |     |       |        |    |       |        |        |        |       |        |     |        |        |        |        |     |     |       |     |        |     |       | 0.716 |     |
| SBS   |   |       |       |     |       |        |    |       |        |        |        |       |        |     |        |        |        |        |     |     |       |     |        |     |       |       |     |
| SBCh  |   |       |       |     |       |        |    |       |        |        |        |       |        |     |        |        |        |        |     |     |       |     |        |     |       |       |     |
| SBR   |   |       |       |     |       |        |    |       |        |        |        |       |        |     |        |        |        |        |     |     |       |     |        |     |       |       |     |

H- hydration, DDT- dough development time, DSt- dough stability, DSo- dough softening, MTI- mixing tolerance index, C2-C5- Mixolab torque at points C2-C5, RE- dough resistance to extension, Den- dough energy, DEx- dough extensibility, LV- loaf volume 100g of flour blend, SV- specific volume, WL- water loss, FBH- fresh bread hardness, FBC- fresh bread cohesiveness, FBS- fresh bread springiness, FBCh- fresh bread chewiness, FBR- fresh bread resilience, SBH- stored bread hardness, SBC- stored bread cohesiveness, SBS- stored bread springiness, SBCh- stored bread Chewiness, SBR- stored bread resilience
